# Supplementary material
Source: Research Square preprint supplement (doi:10.21203/rs.3.rs-9989394/v1)
Supplement: Supplementary file 1 [file 5fe649bc99cb91ac6361fe51.docx]

| **Sl No.** | **Patient code** | **Year of**  **1st-line Imatinib commen-**  **cement** | **Age at disease onset** | **Year of detection of imatinib-resistance** | **Type of resistance** | **Disease phase at resistance onset** | **Type of BCR-ABL1 transcript** |
| --- | --- | --- | --- | --- | --- | --- | --- |
| 1 | CML02 | 2010 | 20 | 2017 | Acquired | CP | e14a2-p210 |
| 2 | CML03 | 2004 | 35 | 2014 | Acquired | CP | e13a2-p210 |
| 3 | CML04 | 2007 | 25 | 2011 | Acquired | CP | e14a2-p210 |
| 4 | CML05 | 2005 | 24 | 2018 | Acquired | CP | e13a2-p210 |
| 5 | CML06 | 2013 | 40 | 2018 | Acquired | CP | e13a2-p210 |
| 6 | CML07 | 2012 | 20 | 2018 | Acquired | CP | e14a2-p210 |
| 7 | CML08 | 2004 | 45 | 2018 | Acquired | CP | e14a2-p210 |
| 8 | CML09 | 2006 | 29 | 2018 | Acquired | CP | e14a2-p210 |
| 9 | CML10 | 2012 | 46 | 2018 | Acquired | CP | e13a2-p210 |
| 10 | CML11 | 2017 | 26 | 2018 | Primary | BC | e14a2-p210 |
| 11 | CML12 | 2005 | 52 | 2018 | Acquired | CP | e14a2-p210 |
| 12 | CML13 | 2006 | 33 | 2018 | Acquired | CP | e14a2-p210 |
| 13 | CML14 | 2011 | 30 | 2019 | Acquired | CP | e14a2-p210 |
| 14 | CML16 | 2010 | 35 | 2019 | Acquired | CP | e14a2-p210 |
| 15 | CML17 | 2005 | 38 | 2014 | Acquired | CP | e14a2-p210 |
| 16 | CML18 | 2012 | 20 | 2016 | Acquired | CP | e13a2-p210 |
| 17 | CML19 | 2017 | 34 | 2019 | Acquired | CP | e14a2-p210 |
| 18 | CML20 | 2005 | 43 | 2019 | Acquired | CP | e13a2-p210 |
| 19 | CML21 | 2014 | 50 | 2019 | Acquired | CP | e14a2-p210 |
| 20 | CML23 | 2004 | 46 | 2017 | Acquired | CP | e14a2-p210 |
| 21 | CML24 | 2009 | 38 | 2012 | Acquired | AP | e14a2-p210 |
| 22 | CML25 | 2004 | 38 | 2013 | Acquired | AP | e13a2-p210 |
| 23 | CML26 | 2016 | 41 | 2019 | Acquired | CP | e13a2-p210 |
| 24 | CML27 | 2013 | 44 | 2019 | Acquired | CP | e14a2-p210 |
| 25 | CML28 | 2008 | 50 | 2017 | Acquired | CP | e14a2-p210 |
| 26 | CML30 | 2017 | 52 | 2018 | Acquired | CP | e14a2-p210 |
| 27 | CML31 | 2011 | 28 | 2018 | Acquired | CP | e14a2 & e13a2 p210 |
| 28 | CML34 | 2005 | 38 | 2019 | Acquired | N.A. | e14a2-p210 |
| 29 | CML35 | 2018 | 5 | 2019 | Primary | BC | e13a2-p210 |
| 30 | CML36 | 2018 | 30 | 2021 | Acquired | N.A. | e14a2-p210 |
| 31 | CML39 | 2017 | 42 | 2019 | Acquired | AP | e14a2-p210 |
| 32 | CML42 | 2009 | 30 | 2022 | Acquired | CP | e14a2-p210 |
| 33 | CML43 | 2020 | 56 | 2022 | Acquired | CP | e14a2-p210 |
| 34 | CML46 | 2020 | 62 | 2021 | Acquired | N.A. | e14a2-p210 |
| 35 | CML48 | 2018 | 34 | 2021 | Acquired | CP | e13a2-p210 |
| 36 | CML49 | 2016 | 37 | 2022 | Acquired | N.A. | e14a2-p210 |
| 37 | CML50 | 2017 | 46 | 2022 | Acquired | AP | e14a2 & e13a2 p210 |
