# Supplementary material
Source: Research Square preprint supplement (doi:10.21203/rs.3.rs-9989394/v1)
Supplement: Supplementary file 2 [file 620f328182c0349b8403daae.docx]

**Supplementary methods:**

**Amplification of BCR–ABL1 junction and kinase domain**

cDNA samples were used to co-amplify the BCR–ABL1 fusion junction along with the entire kinase domain (KD) region of the translocated *ABL1* gene. PCR amplification was performed using a forward primer targeting exon 13 of *BCR* (B2A-F: 5′-ACAGCATTCCGCTGACCATCAATAAG-3′) and a reverse primer targeting the junction of exon 10 and exon 11 of *ABL1* (END-R: 5′-GTCAGTGGTGTCTCTGTGCTCT-3′). This primer pair generated a 1.56 kb amplicon encompassing the complete *ABL1* kinase domain. This amplification strategy ruled out the possibility of amplifying any untranslocated *ABL1* kinase domain region.

**Protein structure preparation**

1. **Sequence Retrieval and Domain Selection**

The full-length amino acid sequence of human tyrosine-protein kinase ABL1 (UniProt ID: P00519) was retrieved from the UniProt database. Based on domain annotations, the SH3 domain (residues 80–139), SH2 domain (residues 150–248), and the kinase domain (residues

250–500) were selected for structural modeling. These regions were chosen because the two clinically observed mutations associated with Imatinib resistance, including T117P (SH3 domain) and Y167H (SH2 domain), are located within this portion of the protein and could influence kinase regulation and drug-binding properties.

1. **Homology Model Preparation**

To obtain reliable structural models of the full SH3–SH2–kinase region of BCR-ABL1, homology modeling was performed separately for the inactive and active conformations. For the inactive conformation, the BLASTp search against the Protein Data Bank (PDB) identified the crystal structure of human ABL1 in its inactive state (PDB ID: 5MO4) as the closest structural template, with 99.55% sequence identity to the query sequence. This structure represents the DFG-out inactive conformation bound to Imatinib. Because the 5MO4 structure

had missing residues spanning 320–337 near the ATP-binding cleft, MODELLER was used to

build a full-length model based on 5MO4, simultaneously reconstructing the missing region. For the active conformation, the same BCR-ABL1 query sequence was modeled using the crystal structure of active SH2 kinase domain of ABL1 protein bound to Dasatinib (PDB ID: 4XEY) as the template. This structure represents the DFG-in active conformation and showed 99.24% sequence identity with the query sequence. To ensure accurate reconstruction of loop and flexible regions, the AlphaFold2 module was employed in combination with template-based modeling using 4XEY. After preparation of both models, their stereochemical quality of both models was evaluated using Ramachandran and ERRAT plot (1). All structures were pre-processed using the Protein Preparation Wizard within the Schrödinger Suite. Pre-processing steps included assignment of bond orders, addition of hydrogen atoms, generation of disulfide bonds, removal of crystallographic water molecules beyond 5 Å of the ligand and capping of any incomplete termini. Protonation states of ionizable residues were optimized at physiological pH (7.0) using PROPKA. The pre-processed structures were subsequently subjected to restrained energy minimization using the OPLS3e force field with an RMSD convergence threshold of 0.30 Å for heavy atoms to relieve steric clashes while retaining the experimentally determined backbone conformation.

1. **Introduction of point mutations and generation of mutant structures**

The T117P (SH3 domain) and Y167H (SH2 domain) mutations were introduced into the wild-type BCR-ABL1 protein structures in both active and inactive conformations using the mutagenesis wizard in PyMOL (version 2.5, Schrödinger, LLC) (2). For each mutation site, the most energetically favorable rotamer was selected from the backbone-dependent rotamer library. Steric clashes within a 5 Å radius of the mutated residues were resolved through iterative rotamer adjustment. The resulting double-mutant (T117P+Y167H) structures were then subjected to energy minimization using the OPLS3e force field to relieve any residual unfavorable contacts introduced by the mutations, while restraining the backbone atoms to preserve the overall domain architecture.

1. **Molecular Dynamics (MD) simulation**

To assess the conformational consequences of the T117P and Y167H mutations and to generate equilibrated structures suitable for subsequent docking studies, extensive molecular dynamics (MD) simulations were performed using the Desmond module within the Schrödinger Suite. Both wild-type and double-mutant (T117P+Y167H) BCR-ABL1 structures in active and inactive conformations were simulated independently. Each protein system was solvated in an orthorhombic simulation box with explicit TIP3P water molecules, maintaining a minimum buffer distance of 10 Å between the protein and the box boundary. The system charge was neutralized by the addition of counter ions (Na⁺ or Cl⁻ as appropriate) and 0.15 M NaCl was added to mimic physiological ionic strength. The OPLS3e force field was employed for all simulations. Prior to production runs, each system was subjected to the default Desmond relaxation protocol, consisting of sequential stages of minimization, restrained heating and unrestrained equilibration. Production MD simulations were carried out for 500 ns at a temperature of 300 K and a pressure of 1.01325 bar, maintained using the Nosé-Hoover thermostat and Martyna-Tobias-Klein barostat, respectively. A time step of 2 fs was used, and trajectory frames were recorded at 100 ps intervals for analysis. The overall stability of each simulation was assessed by computing the root mean square deviation (RMSD) of backbone atoms relative to the initial minimized structure as a function of simulation time. Per-residue structural flexibility was evaluated by root mean square fluctuation (RMSF) analysis calculated over the equilibrated portion of the trajectory. Structural superposition of wild-type and mutant trajectories was performed to identify domain-specific conformational deviations, with particular attention to the SH3 domain, SH2 domain, SH2-kinase linker region, activation loop, and the DFG motif.

1. **Model validation**

The stereochemical quality of the equilibrated wild-type and mutant protein models obtained from MD simulation was assessed using the Ramachandran plot generated by the PROCHECK server (3). The percentage of residues falling in the most favored, additionally allowed, generously allowed, and disallowed regions of the Ramachandran space was evaluated to ensure structural reliability. Additionally, the overall quality factor of the protein models was assessed using the ERRAT server (https://saves.mbi.ucla.edu/) (3), which evaluates the statistics of non-bonded atom–atom interactions in the structure and provides a confidence score reflecting the proportion of the protein for which the calculated error value falls below the 95% rejection limit. Models with Ramachandran plot values exceeding 90% residues in the most favored regions and ERRAT quality factors above 80 were considered acceptable for downstream docking analyses (1).

**Ligand preparation**

Three-dimensional structures of the tyrosine kinase inhibitors Imatinib (PubChem CID: 5291), Nilotinib (PubChem CID: 644241), and Dasatinib (PubChem CID: 3062316) were retrieved from the PubChem database (https://pubchem.ncbi.nlm.nih.gov) in SDF format. Ligand structures were prepared using the LigPrep module of the Schrödinger Suite. During preparation, the OPLS3e force field was applied, ionization states were generated at a target pH of 7.0 ± 2.0 using Epik, and stereoisomers were retained from the input geometry. Energy minimization was performed to optimize the ligand geometry. The prepared ligands were used as input for all subsequent molecular docking calculations.

**Molecular docking**

Molecular docking studies were performed using the Glide module of the Schrödinger Suite to investigate the binding interactions of Imatinib, Nilotinib and Dasatinib, with both wild-type and T117P+Y167H mutant BCR-ABL1 kinase structures. Consistent with the established binding modes of these inhibitors, Imatinib and Nilotinib (type II inhibitors that preferentially bind the inactive DFG-out conformation) were docked to the inactive kinase structures, whereas Dasatinib (a type I inhibitor targeting the active DFG-in conformation) was docked to the active kinase structure. The receptor grid for each protein was generated using the Receptor Grid Generation module. The grid center was defined based on the coordinates of the co-crystallized ligand in the respective PDB structures, with a grid box of default dimensions (inner box: 10 Å; outer box: 20 Å) enclosing the ATP-binding pocket. For mutant structures lacking a co-crystallized ligand, the grid was centered on the equivalent binding site residues identified by structural superposition with the corresponding wild-type co-crystal structure. Docking was performed using the Extra Precision (XP) mode of Glide, which applies to a more extensive sampling and scoring protocol than Standard Precision (SP) mode, with flexible ligand sampling and rigid receptor treatment. Post-docking, the top-ranked pose for each ligand–receptor complex was selected based on the Glide XP docking score (expressed in kcal/mol). Binding interactions including hydrogen bonds, π–π stacking, halogen bonds and hydrophobic contacts were analyzed using the Ligand Interaction Diagram module. To validate the docking protocol, the co-crystallized ligands (Imatinib from PDB: 2HYY and Dasatinib from PDB: 4XEY) were re-docked into their respective binding sites, and the RMSD between the docked pose and the experimentally determined co-crystal conformation was computed; RMSD values below 2.0 Å were considered indicative of a reliable docking protocol (4).

**Structural superposition and comparative analysis**

Structural superposition of wild-type and mutant BCR-ABL1 kinase models was performed using the protein structure alignment tools in PyMOL (4). Backbone Cα atoms were used for alignment and RMSD values were computed for individual domains (SH3, SH2, kinase N-lobe, kinase C-lobe, activation loop) to quantify local conformational deviations. Particular attention was paid to the relative positioning of the SH3 domain with respect to the SH2-kinase linker, the orientation of the SH2 domain relative to the N-terminal kinase lobe and the configuration of key structural elements within the kinase domain including the activation loop (A-loop), the DFG motif (Asp381-Phe382-Gly383), the αC-helix, and the gatekeeper residue Thr315. All molecular graphics and structural figures were generated using PyMOL (version 2.5, Schrödinger, LLC).

**References:**

1. Pal S, Paul B, Bandopadhyay P, Preethy N, Sarkar D, Rahaman O, et al. Synthesis and characterization of new potent TLR7 antagonists based on analysis of the binding mode using biomolecular simulations. European Journal of Medicinal Chemistry. 2021 Jan;210:112978. doi:10.1016/j.ejmech.2020.112978

2. Bhowmik D, Pal S, Lahiri A, Talukdar A, Paul S. Emergence of multiple variants of SARS-CoV-2 with signature structural changes [Internet]. Evolutionary Biology; 2020 [cited 2026 May 7]. Available from: http://biorxiv.org/lookup/doi/10.1101/2020.04.26.062471 doi:10.1101/2020.04.26.062471

3. SAVESv6.1 - Structure Validation Server [Internet]. [cited 2026 Apr 3]. Available from: https://saves.mbi.ucla.edu/

4. Pal S, Kumar V, Kundu B, Bhattacharya D, Preethy N, Reddy MP, et al. Ligand-based Pharmacophore Modeling, Virtual Screening and Molecular Docking Studies for Discovery of Potential Topoisomerase I Inhibitors. Comput Struct Biotechnol J. 2019 Jan;17:291–310. doi:10.1016/j.csbj.2019.02.006

**Supplementary figure legends:**

**Supplementary Figure S1:** Structural domains of BCR-ABL1 depicted in cartoon representation in (**A**) active and (**B**) inactive conformations. Their different structural domains are represented in various colored cartoon representations.

**Supplementary Figure S2:** Detection of BCR-ABL1 transcript variants in the prospective identification cohort of imatinib-resistant CML (N=37). **(A)** The schematic of PCR strategy. **(B)** The representative image of the BCR-ABL1 fusion transcript detection by agarose gel electrophoresis of PCR-amplified products. cDNA specimens, of concerned cases as mentioned, were amplified with indicated primers (A) and product size was marked by agarose gel electrophoresis (B).

**Supplementary Figure S3: (A**) Ramachandran plot and (**B**) ERRAT plot for the inactive form of BCR-ABL1. (**C**) Ramachandran plot and (**D**) ERRAT plot for the active form of the kinase protein.

**Supplementary Fig. S4: A.** RMSD and **B.** RMSF plot for both mutated active and inactive conformations of BCR-ABL1. Those values for active conformation are represented by blue lines whereas inactive conformation is represented by purple lines.

**Supplementary Fig. S5:** Generation and confirmation of isogenic lines expressing wild-type (WT) or mutant construct of BCR-ABL1. **(A)**. Construction of T117P+Y167H-mutant BCR-ABL1. Site directed mutagenesis was performed to replace the Thr (CAC) at 117th position with Pro (CCC) and Tyr (ATA) at the 167th position with His (ACA). **(B)** Construction of T315I-mutant BCR-ABL1. Site directed mutagenesis was performed to replace the Thr (CAC) at 315th position with Ile (CAT). For **A** & **B**, The schematic of plasmid, with WT BCR-ABL1 marked by **blue** line, is shown in left and the chromatogram (in right) is showing the intended mutation. **(C)** Ba/F3 cells were electroporated with plasmid (5 µg) harboring WT, T117P+Y167H or T315I-mutant BCR-ABL1 construct. Cell extracts were prepared and WB analysis was performed using anti-ABL1 antibody. Proteins of interest, with specific molecular weight, are indicated.

**Supplementary Fig. S6:** The effect of imatinib treatment on STAT5-phosphorylation as downstream effector of BCR-ABL1 signalling cascade. **(A & B)** Ba/F3 cells [harboring wild-type/WT (in left), T117P+Y167H- (in middle) or T315-mutant (in right) BCR-ABL1 construct] were treated with imatinib for 4 h at increasing dose (as specified in A) or at 1 µM for increasing time (as specified in B). Cell extracts were prepared and WB analysis was performed using antibodies, as indicated. **(C)** Representative images of immunohistochemical analysis with *ex vivo* mice tumor specimens, using antibody against phospho-Stat5 (Tyr694).

**Supplementary Fig. S7:** The effect of dasatinib treatment on STAT5-phosphorylation as downstream effector of BCR-ABL1 signalling cascade. **(A)** Ba/F3 cells [harboring wild-type (WT) or T117P+Y167H-mutant BCR-ABL1 construct] were treated with dasatinib (100 nM) for 4 h. Cell extracts were prepared and WB analysis was performed using antibodies, as indicated. **(B)** Representative images of immunohistochemical analysis with *ex vivo* mice tumor specimens, using antibody against phospho-Stat5 (Tyr694).

**Supplementary table legends:**

**Supplementary Table S1:** The clinico-pathological information of the prospective identification cohort of imatinib-resistant CML (N=37). Individual cases were referred with anonymized ‘patient code’ and corresponding information were listed. ‘CP’, chronic phase; ‘AP’, accelerated phase; ‘BC’, blast crisis; ‘N.A.’, not available

**Supplementary Table S2:** The mutation status of BCR-ABL1 in the validation cohort of imatinib-resistant CML (N=6). Individual cases were referred with anonymized ‘patient code’ and corresponding kinase domain (KD) and SH2-SH3 domain mutations were listed.
