# Supplementary material
Source: Research Square preprint supplement (doi:10.21203/rs.3.rs-9989394/v1)
Supplement: Supplementary file 3 [file 781bcc20bfa46703fba04653.docx]

| **CML ID** | **Reference Sequence** | **Position (bp)** | **REF** | **ALT** | **REF Reads** | **ALT Reads** | **Total Depth** | **VAF (%)** | **AA Change** |
| --- | --- | --- | --- | --- | --- | --- | --- | --- | --- |
| CML 02 | X16416.1 | 496 | A | C | 4584 | 1867 | 6451 | 28.9412 | T117P |
| X16416.1 | 646 | T | C | 997 | 3082 | 4079 | 75.5577 | Y167H |
| CML 03 | X16416.1 | 496 | A | C | 4626 | 1795 | 6421 | 27.9551 | T117P |
| X16416.1 | 646 | T | C | 4968 | 1816 | 6784 | 26.7689 | Y167H |
| X16416.1 | 1222 | T | G | 1926 | 4866 | 6792 | 71.6431 | F359V |
| CML 04 | — | — | — | — | — | — | — | — | No mutation detected |
| CML 05 | X16416.1 | 496 | A | C | 2987 | 2755 | 5742 | 47.9798 | T117P |
| X16416.1 | 646 | T | C | 3388 | 3094 | 6482 | 47.7322 | Y167H |
| X16416.1 | 896 | G | A | 4476 | 1937 | 6413 | 30.2043 | G250E |
| CML 06 | X16416.1 | 896 | G | A | 192 | 6564 | 6756 | 97.1581 | G250E |
| CML 07 | X16416.1 | 496 | A | C | 584 | 6150 | 6734 | 91.3276 | T117P |
| X16416.1 | 646 | T | C | 597 | 6431 | 7028 | 91.5054 | Y167H |
| CML 08 | X16416.1 | 1522 | G | A | 86 | 4182 | 4268 | 97.985 | E459K |
| CML 09 | X16416.1 | 896 | G | A | 60 | 6519 | 6579 | 99.088 | G250E |
| CML 10 | X16416.1 | 974 | A | G | 1242 | 475 | 1717 | 27.6645 | D276G |
| X16416.1 | 1522 | G | A | 400 | 746 | 1146 | 65.096 | E459K |
| CML 11 | — | — | — | — | — | — | — | — | No mutation detected |
| CML 12 | X16416.1 | 496 | A | C | 40 | 6983 | 7023 | 99.4304 | T117P |
| X16416.1 | 646 | T | C | 42 | 7095 | 7137 | 99.4115 | Y167H |
| CML 13 | X16416.1 | 896 | G | A | 4088 | 2756 | 6844 | 40.2688 | G250E |
| X16416.1 | 1091 | C | T | 3182 | 3523 | 6705 | 52.5429 | T315I |
| CML 14 | X16416.1 | 910 | G | A | 1108 | 603 | 1711 | 35.2425 | E255K |
| X16416.1 | 496 | A | C | 145 | 88 | 233 | 37.7682 | T117P |
| X16416.1 | 646 | T | C | 144 | 89 | 233 | 38.1974 | Y167H |
| CML 16 | — | — | — | — | — | — | — | — | No mutation detected |
| CML 17 | X16416.1 | 496 | A | C | 40 | 202 | 242 | 83.4711 | T117P |
| X16416.1 | 646 | T | C | 57 | 180 | 237 | 75.9494 | Y167H |
| CML 18 | X16416.1 | 974 | A | G | 1 | 236 | 237 | 99.5781 | D276G |
| CML 19 | X16416.1 | 1522 | G | A | 1264 | 6121 | 7385 | 82.8842 | E459K |
| CML 20 | — | — | — | — | — | — | — | — | No mutation detected |
| CML 21 | X16416.1 | 1098 | C | A | 3 | 7391 | 7394 | 99.9594 | F317L |
| CML 23 | X16416.1 | 496 | A | C | 0 | 233 | 233 | 100 | T117P |
| X16416.1 | 646 | T | C | 0 | 231 | 231 | 100 | Y167H |
| CML 24 | X16416.1 | 1334 | A | G | 145 | 6796 | 6941 | 97.911 | H396R |
| X16416.1 | 496 | A | C | 39 | 202 | 241 | 83.8174 | T117P |
| X16416.1 | 646 | T | C | 36 | 208 | 244 | 85.2459 | Y167H |
| CML 25 | X16416.1 | 1222 | T | G | 14 | 7491 | 7505 | 99.8135 | F359V |
| X16416.1 | 1078 | T | C | 45 | 175 | 220 | 79.5455 | F311L |
| X16416.1 | 1334 | A | G | 182 | 38 | 220 | 17.2727 | H396R |
| CML 26 | — | — | — | — | — | — | — | — | No mutation detected |
| CML 27 | — | — | — | — | — | — | — | — | No mutation detected |
| CML 28 | X16416.1 | 496 | A | C | 93 | 144 | 237 | 60.7595 | T117P |
| X16416.1 | 646 | T | C | 90 | 149 | 239 | 62.3431 | Y167H |
| X16416.1 | 1522 | G | A | 176 | 61 | 237 | 25.7384 | E459K |
| CML 30 | X16416.1 | 896 | G | A | 33 | 199 | 232 | 85.7759 | G250E |
| CML 31 | — | — | — | — | — | — | — | — | No mutation detected |
| CML 34 | X16416.1 | 1098 | C | A | 4845 | 1782 | 6627 | 26.89 | F317L |
| X16416.1 | 1334 | A | G | 5663 | 922 | 6585 | 14.0015 | H396R |
| CML 35 | X16416.1 | 1222 | T | G | 14 | 7491 | 7505 | 99.8135 | F359V |
| CML 36 | X16416.1 | 1098 | C | A | 1629 | 5036 | 6665 | 75.5589 | F317L |
| X16416.1 | 1309 | A | T | 5652 | 828 | 6480 | 12.7778 | M388L |
| CML 39 | X16416.1 | 904 | T | C | 1397 | 5358 | 6755 | 79.319 | Y253H |
| CML 42 | X16416.1 | 1199 | T | C | 50 | 6738 | 6788 | 99.2634 | M351T |
| CML 43 | X16416.1 | 496 | A | C | 6323 | 536 | 6859 | 7.8146 | T117P |
| X16416.1 | 877 | A | G | 545 | 6423 | 6968 | 92.1785 | M244V |
| CML 46 | X16416.1 | 877 | A | G | 180 | 6802 | 6982 | 97.4219 | M244V |
| CML 48 | X16416.1 | 496 | A | C | 6031 | 676 | 6707 | 10.079 | T117P |
| X16416.1 | 646 | T | C | 5995 | 667 | 6662 | 10.012 | Y167H |
| X16416.1 | 1039 | C | G | 5997 | 708 | 6705 | 10.5593 | L298V |
| X16416.1 | 1211 | A | G | 1387 | 5159 | 6546 | 78.8115 | E355G |
| CML 49 | — | — | — | — | — | — | — | — | No mutation detected |
| CML 50 | X16416.1 | 496 | A | C | 1726 | 5081 | 6807 | 74.6437 | T117P |
| X16416.1 | 646 | T | C | 2209 | 4663 | 6872 | 67.8551 | Y167H |
