# Supplementary material
Source: Research Square preprint supplement (doi:10.21203/rs.3.rs-9989394/v1)
Supplement: Supplementary file 4 [file 7fe9b42885212db6dfea62bd.docx]

| **Sl No.** | **Patient code** | **KD mutation** | **SH2-SH3 mutation** |
| --- | --- | --- | --- |
| 1 | CMLA2 | M244V | Nil |
| 2 | CMLA4 | F317L,M388L | Nil |
| 3 | CMLA5 | M244V | T117P |
| 4 | CMLA6 | Nil | Nil |
| 5 | CMLA9 | L298V, E355G | T117P+Y167H |
| 6 | CMLB2 | Nil | Nil |
