# Supplementary material
Source: Research Square preprint supplement (doi:10.21203/rs.3.rs-9989394/v1)
Supplement: Supplementary file 5 [file d8a6f788c5465b0d50543b47.docx]

| **CML ID** | **Reference Sequence** | **Position (bp)** | **REF** | **ALT** | **REF Reads** | **ALT Reads** | **Total Depth** | **VAF (%)** | **AA Change** |
| --- | --- | --- | --- | --- | --- | --- | --- | --- | --- |
| CMLA2 | X16416.1 | 877 | A | G | 311 | 8899 | 9222 | 96.6232 | M244V |
| CMLA4 | X16416.1 | 1098 | C | A | 9351 | 30767 | 40143 | 76.6913 | F317L |
| X16416.1 | 1309 | A | T | 31979 | 5163 | 37182 | 13.9007 | M388L |
| CMLA5 | X16416.1 | 496 | A | C | 208435 | 174107 | 383085 | 45.5132 | T117P |
| X16416.1 | 877 | A | G | 193372 | 220080 | 413791 | 53.2299 | M244V |
| CMLA6 | — | — | — | — | — | — | — | — | No mutation detected |
| CMLA9 | X16416.1 | 496 | A | C | 23463 | 12621 | 36121 | 34.9767 | T117P |
| X16416.1 | 646 | T | C | 18319 | 9677 | 28018 | 34.5657 | Y167H |
| X16416.1 | 1039 | C | G | 27258 | 2449 | 29721 | 8.2438 | L298V |
| X16416.1 | 1211 | A | G | 14080 | 18438 | 32539 | 56.7009 | E355G |
| CMLB2 | — | — | — | — | — | — | — | — | No mutation detected |
